# Supplementary material for: A dynamic, ring-forming MucB / RseB-like protein influences spore shape in Bacillus subtilis
Source: PubMed Central journal article supplement (PMC7769602; doi:10.1371/journal.pgen.1009246), 2020-12-14

**A**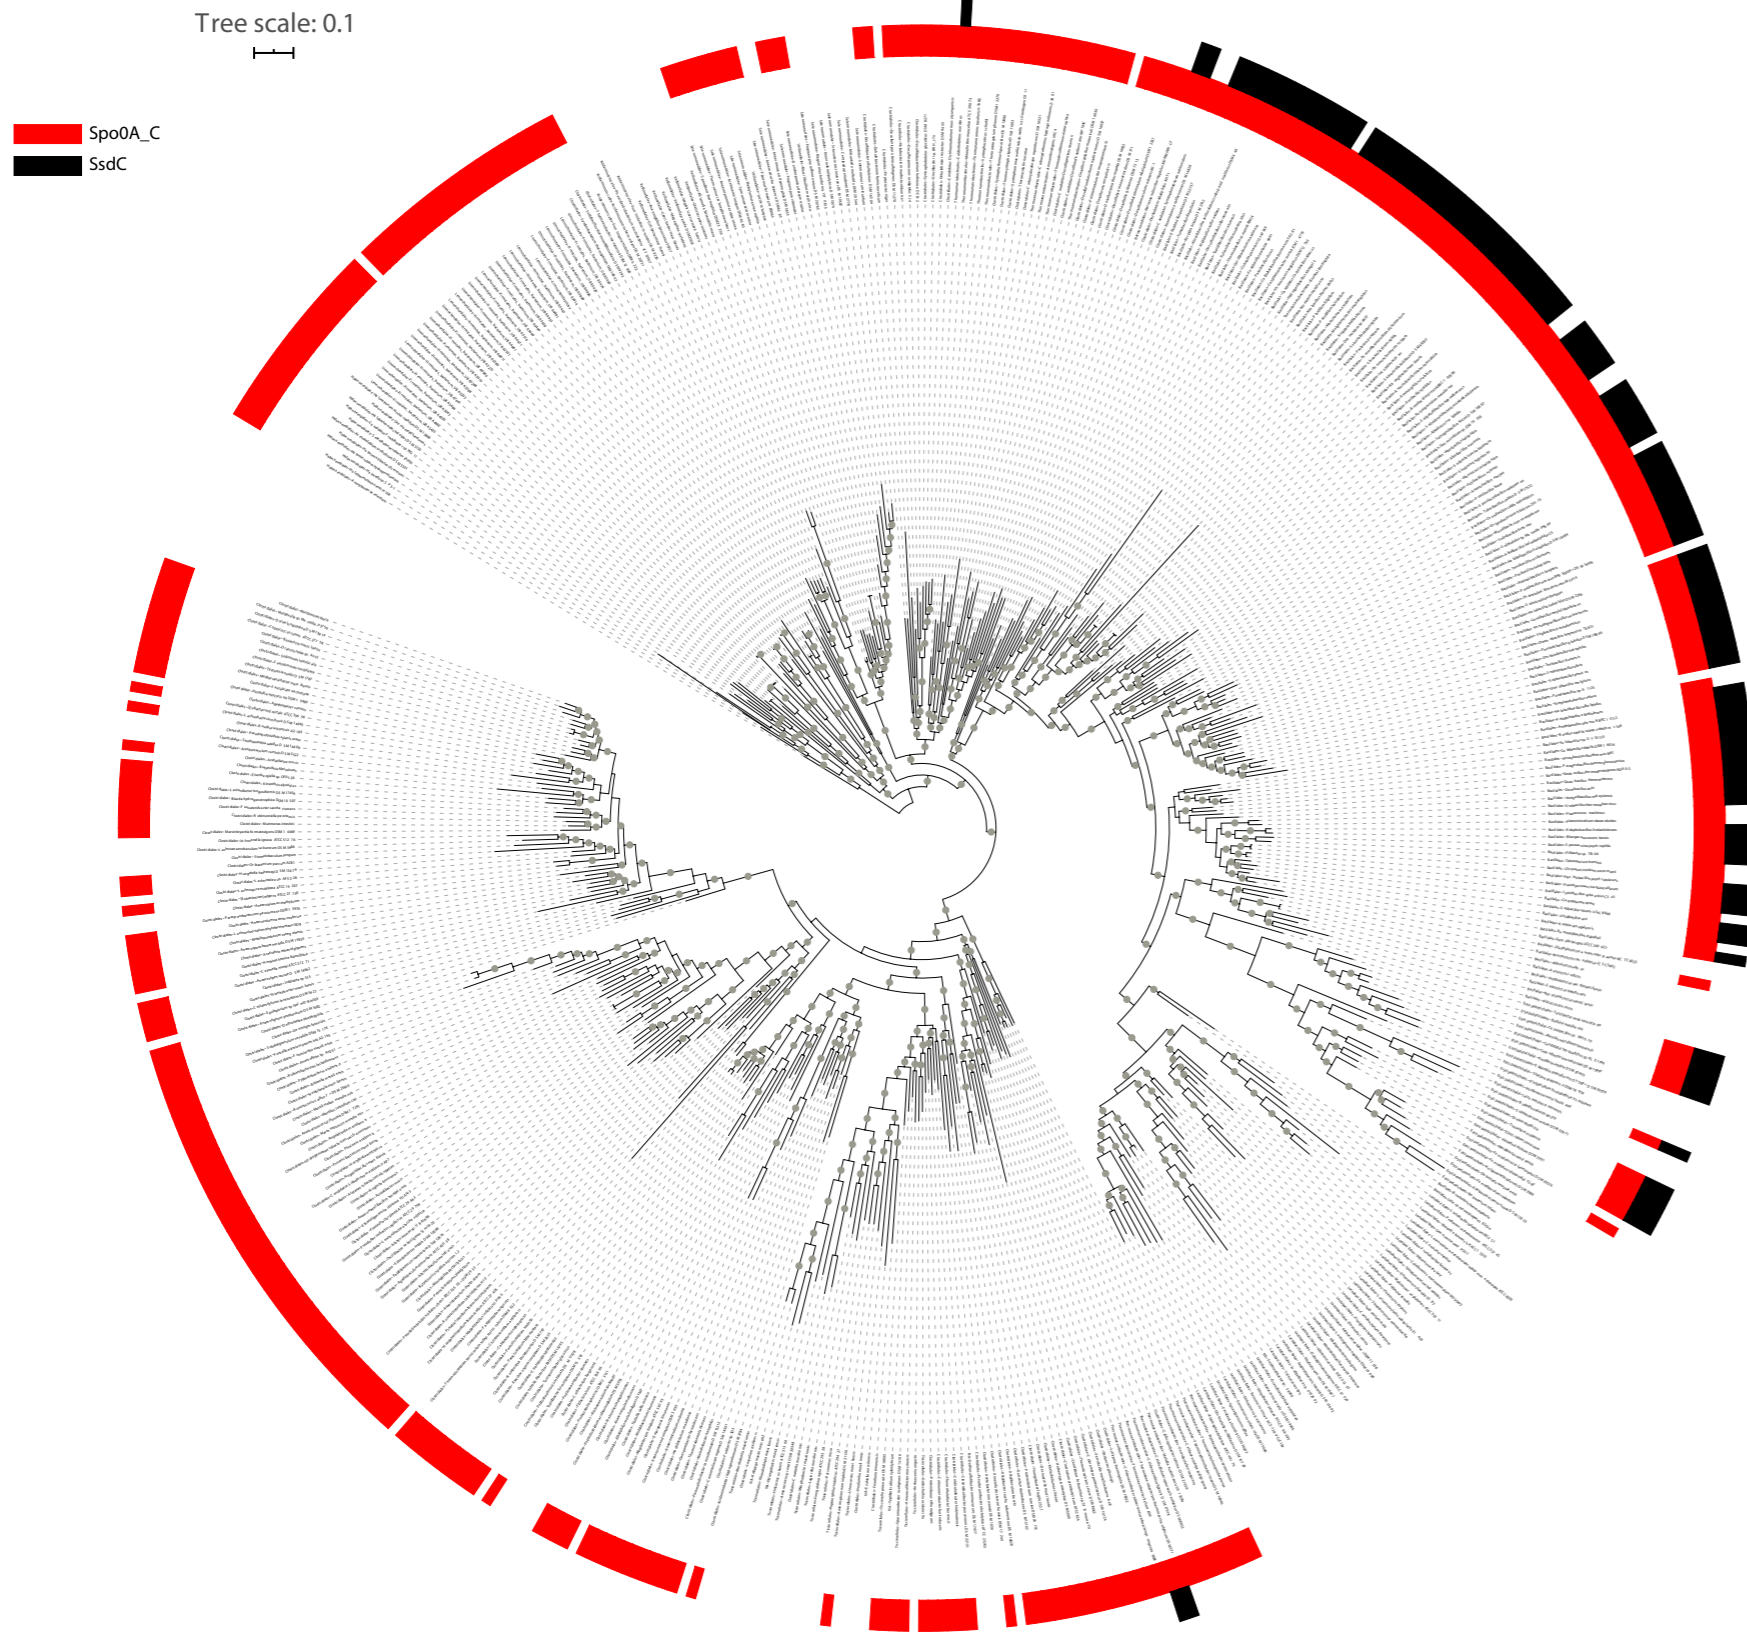**B**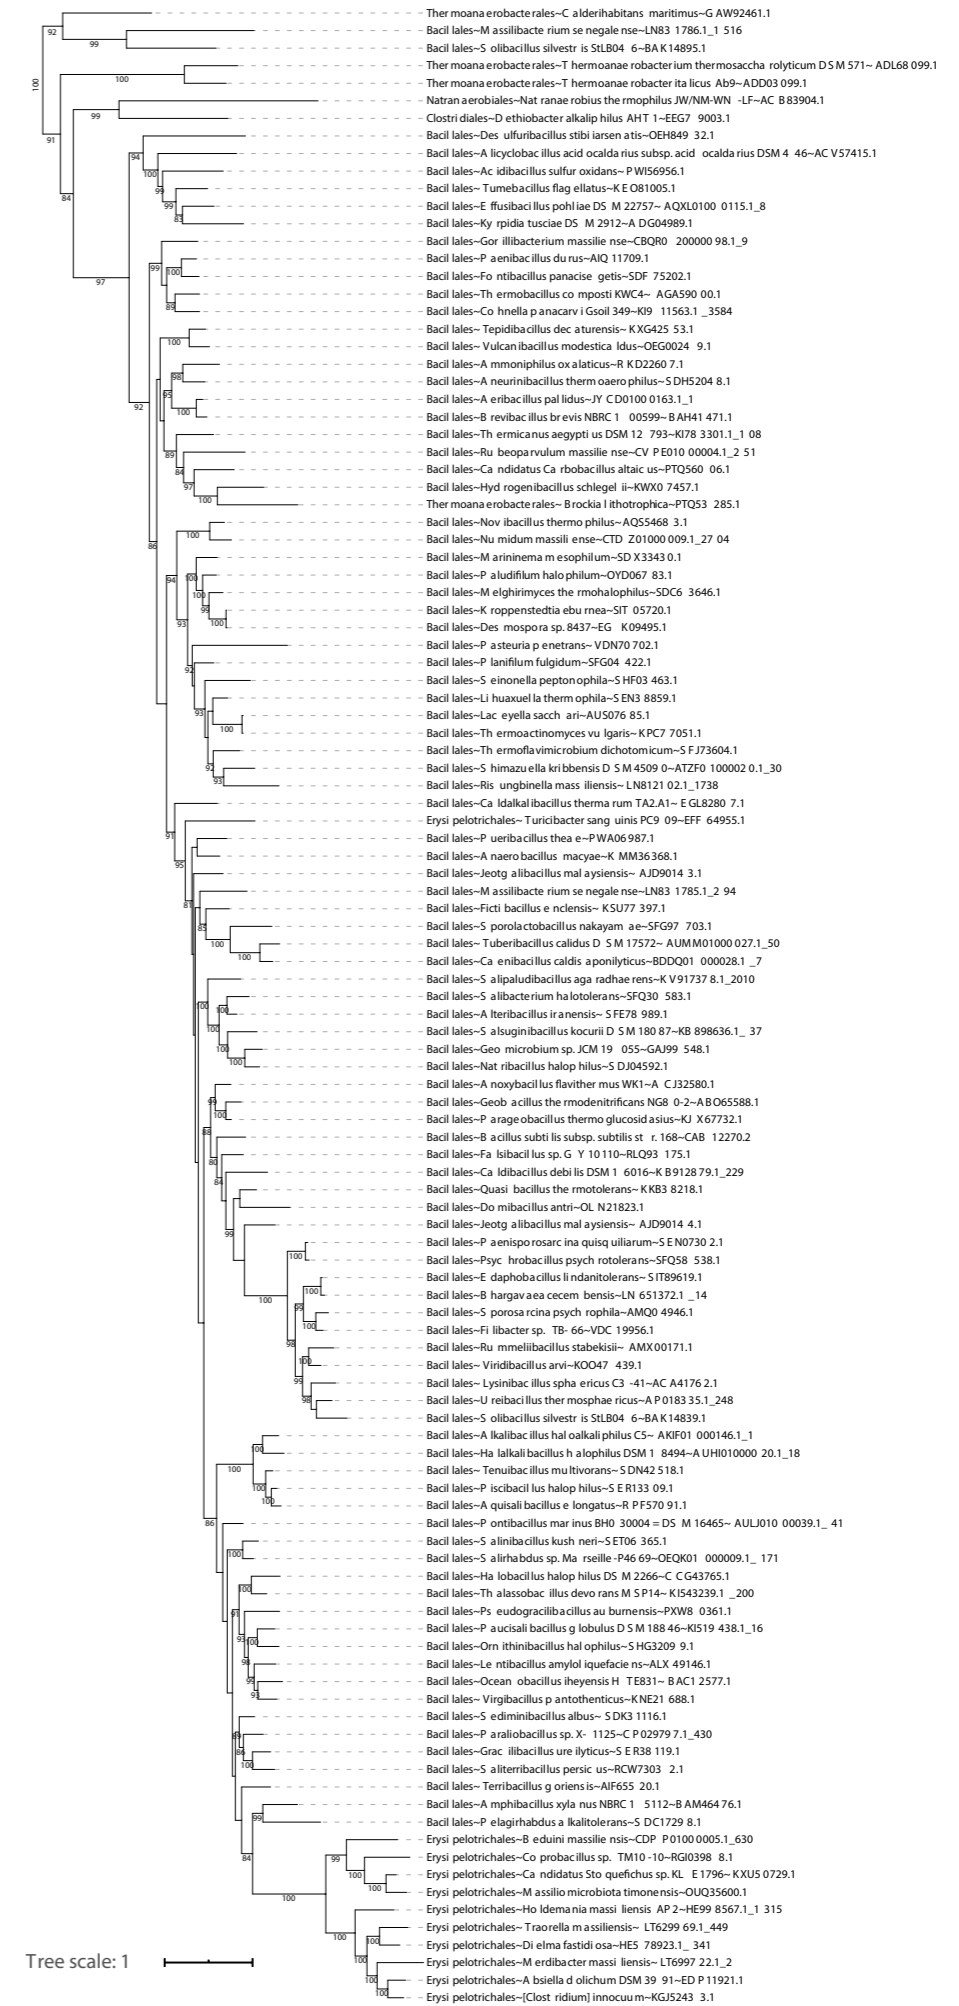

Supplement: pgen.1009246.s013.pdf [file pgen.1009246.s013.pdf]
