# Supplementary material for: A dynamic, ring-forming MucB / RseB-like protein influences spore shape in Bacillus subtilis
Source: PubMed Central journal article supplement (PMC7769602; doi:10.1371/journal.pgen.1009246), 2020-12-14
Supplement: pgen.1009246.s015.pdf [file pgen.1009246.s015.pdf]

**S1 Table. Independently validated sporulation genes identified by Tn-seq.**

| Gene                 | <i>p</i> -value         | Tn. fold change<br>$\Delta\text{ssdC}/\text{WT}^{\text{a}}$ | Possible product                                                                   | Spo. in $\Delta\text{ssdC}$<br>(% $\pm$ STDEV) <sup>b</sup> | Spo. fold change /<br>$\Delta\text{ssdC}^{\text{c}}$ |
|----------------------|-------------------------|-------------------------------------------------------------|------------------------------------------------------------------------------------|-------------------------------------------------------------|------------------------------------------------------|
| <b><i>ssdC</i></b>   | -                       | -                                                           | RseB-like protein required for spore shape                                         | 3.21 $\pm$ 1.71                                             | -                                                    |
| <b><i>cotE</i></b>   | 3.20 x 10 <sup>-4</sup> | 333.3                                                       | Outer spore coat morphogenetic protein                                             | 0.16 $\pm$ 1.09                                             | 20.1                                                 |
| <b><i>cotZ</i></b>   | 4.20 x 10 <sup>-4</sup> | 71.4                                                        | Spore crust protein, necessary for the assembly of the spore crust                 | 2.61 $\pm$ 1.31                                             | 1.23                                                 |
| <b><i>ctpB</i></b>   | < 10 <sup>-7</sup>      | 37.0                                                        | Processing serine protease, cleaves SpoIVFA.                                       | 0.90 $\pm$ 0.29                                             | 3.58                                                 |
| <b><i>dltB</i></b>   | < 10 <sup>-7</sup>      | 2.3                                                         | D-alanine transfer from DltC to undecaprenol-phosphate                             | 1.27 $\pm$ 0.63                                             | 2.52                                                 |
| <b><i>dltD</i></b>   | 1.66 x 10 <sup>-4</sup> | 4.0                                                         | D-alanine transfer from undecaprenol-phosphate to the poly(glycerophosphate) chain | 1.80 $\pm$ 0.72                                             | 1.79                                                 |
| <b><i>mcsA</i></b>   | 1.20 x 10 <sup>-5</sup> | 6.9                                                         | Modulator of CtsR dependent repression                                             | 1.18 $\pm$ 0.50                                             | 2.73                                                 |
| <b><i>rpsT</i></b>   | 4.13 x 10 <sup>-3</sup> | 333.3                                                       | Ribosomal protein                                                                  | 2.99 $\pm$ 1.80                                             | 1.07                                                 |
| <b><i>safA</i></b>   | < 10 <sup>-7</sup>      | 25.6                                                        | Spore coat morphogenetic protein and major organizer of the inner spore coat       | 0.07 $\pm$ 0.02                                             | 48.3                                                 |
| <b><i>skfA</i></b>   | < 10 <sup>-7</sup>      | 2.6                                                         | Spore killing factor                                                               | 2.41 $\pm$ 0.01                                             | 1.33                                                 |
| <b><i>spoVID</i></b> | 1.50 x 10 <sup>-4</sup> | 250                                                         | Spore coat morphogenetic protein, promotes encasement of the spore                 | 0.09 $\pm$ 0.03                                             | 36.2                                                 |
| <b><i>yacL</i></b>   | 1.40 x 10 <sup>-4</sup> | 3.2                                                         | Unknown                                                                            | 0.46 $\pm$ 0.20                                             | 7.04                                                 |
| <b><i>yceE</i></b>   | 1.90 x 10 <sup>-2</sup> | 4.2                                                         | Unknown                                                                            | 1.76 $\pm$ 1.08                                             | 1.82                                                 |
| <b><i>yjgD</i></b>   | 2.32 x 10 <sup>-2</sup> | 6.8                                                         | Unknown                                                                            | 2.55 $\pm$ 0.55                                             | 1.26                                                 |
| <b><i>yImD</i></b>   | 2.00 x 10 <sup>-5</sup> | 5.6                                                         | Peptidoglycan-editing factor                                                       | 3.43 $\pm$ 0.90                                             | 0.94                                                 |
| <b><i>ymzB</i></b>   | 7.55 x 10 <sup>-3</sup> | 2.6                                                         | Unknown                                                                            | 2.17 $\pm$ 1.41                                             | 1.48                                                 |
| <b><i>yochH</i></b>  | 3.00 x 10 <sup>-6</sup> | 3.3                                                         | Peptidoglycan hydrolase                                                            | 1.82 $\pm$ 0.23                                             | 1.77                                                 |
| <b><i>yodJ</i></b>   | 1.31 x 10 <sup>-2</sup> | 2.3                                                         | LD-carboxypeptidase                                                                | 0.42 $\pm$ 0.37                                             | 7.59                                                 |
| <b><i>ypbE</i></b>   | 2.33 x 10 <sup>-3</sup> | 2.3                                                         | Peptidoglycan-binding protein                                                      | 3.22 $\pm$ 0.81                                             | 1.00                                                 |
| <b><i>yqfT</i></b>   | 4.02 x 10 <sup>-2</sup> | 125                                                         | Unknown                                                                            | 0.94 $\pm$ 0.50                                             | 3.43                                                 |
| <b><i>yqhG</i></b>   | 6.00 x 10 <sup>-5</sup> | 333                                                         | Unknown                                                                            | 1.19 $\pm$ 0.76                                             | 2.69                                                 |
| <b><i>yqhH</i></b>   | 1.00 x 10 <sup>-5</sup> | 6.0                                                         | Similar to sucrose non-fermenting 2 helicase                                       | 1.21 $\pm$ 1.07                                             | 2.65                                                 |
| <b><i>yqhQ</i></b>   | 4.40 x 10 <sup>-4</sup> | 3.4                                                         | Unknown                                                                            | 2.14 $\pm$ 0.23                                             | 1.50                                                 |
| <b><i>yrrI</i></b>   | 1.21 x 10 <sup>-3</sup> | 4.0                                                         | Similar to coordinator of zonal elongation                                         | 0.54 $\pm$ 0.35                                             | 5.92                                                 |
| <b><i>yrrL</i></b>   | 2.00 x 10 <sup>-6</sup> | 1.9                                                         | Potential terminase for peptidoglycan polymerization                               | 2.77 $\pm$ 0.55                                             | 1.16                                                 |
| <b><i>yteV</i></b>   | 8.81 x 10 <sup>-4</sup> | 250                                                         | Unknown                                                                            | 2.33 $\pm$ 0.76                                             | 1.38                                                 |
| <b><i>yxiS</i></b>   | 2.79 x 10 <sup>-2</sup> | 2.1                                                         | Unknown                                                                            | 2.51 $\pm$ 1.75                                             | 1.28                                                 |

**Legend:**

<sup>a</sup> Fold-difference in the number of transposon insertions: e.g. the  $\Delta\text{ssdC}$  mutant had 333.3-fold less transposon insertions than the WT.

<sup>b</sup> Sporulation efficiency, relative to WT, of  $\Delta\text{ssdC}$  double mutants with the listed genes: e.g. the  $\Delta\text{ssdC} \Delta\text{cotE}$  double mutant had a sporulation efficiency of 0.16 %. The data is average of two biological replicates.

<sup>c</sup> Fold-change in sporulation efficiency of the  $\Delta\text{ssdC}$  double mutants with the listed genes, relative to the  $\Delta\text{ssdC}$  single mutant: the  $\Delta\text{ssdC} \Delta\text{cotE}$  mutant produced 20.1-fold less spores than the  $\Delta\text{ssdC}$  single mutant.
