# Supplementary material for: A dynamic, ring-forming MucB / RseB-like protein influences spore shape in Bacillus subtilis
Source: PubMed Central journal article supplement (PMC7769602; doi:10.1371/journal.pgen.1009246), 2020-12-14
Supplement: pgen.1009246.s016.pdf [file pgen.1009246.s016.pdf]

**S2 Table. Spore coat and spore crust genes identified by Tn-seq.**

| <b>Gene</b>   | <b>p-value</b>        | <b>Tn. fold change<br/><math>\Delta</math>ssdC /WT<sup>a</sup></b> | <b>Possible product</b>                                                      |
|---------------|-----------------------|--------------------------------------------------------------------|------------------------------------------------------------------------------|
| <i>cotC</i>   | $1.95 \times 10^{-2}$ | 1.6                                                                | Spore coat protein (outer)                                                   |
| <i>cotE</i>   | $3.20 \times 10^{-4}$ | 333.3                                                              | Outer spore coat morphogenetic protein                                       |
| <i>cotG</i>   | $7.91 \times 10^{-3}$ | 1.2                                                                | Outer spore coat protein                                                     |
| <i>cotH</i>   | $< 10^{-7}$           | 6.5                                                                | Protein kinase, required for the assembly of several outer coat proteins     |
| <i>cotJA</i>  | $4.35 \times 10^{-2}$ | 3.0                                                                | Unknown, polypeptide composition of the spore coat                           |
| <i>cotM</i>   | $1.08 \times 10^{-2}$ | 2.6                                                                | Spore coat protein (outer)                                                   |
| <i>cotO</i>   | $1.43 \times 10^{-2}$ | 1.3                                                                | Spore coat morphogenetic protein                                             |
| <i>cotR</i>   | $4.26 \times 10^{-2}$ | 1.1                                                                | Outer spore coat lipolytic enzyme                                            |
| <i>cotS</i>   | $2.27 \times 10^{-2}$ | 1.5                                                                | Outer spore coat protein                                                     |
| <i>cotSA</i>  | $1.78 \times 10^{-2}$ | 1.4                                                                | Spore coat protein                                                           |
| <i>cotY</i>   | $2.11 \times 10^{-3}$ | 500.0                                                              | Main structural component of the spore crust                                 |
| <i>cotZ</i>   | $4.20 \times 10^{-4}$ | 71.4                                                               | Spore crust anchor protein                                                   |
| <i>safA</i>   | $< 10^{-7}$           | 25.6                                                               | Spore coat morphogenetic protein and major organizer of the inner spore coat |
| <i>spoVID</i> | $1.50 \times 10^{-4}$ | 250.0                                                              | Spore coat morphogenetic protein, promotes encasement of the spore           |

**Legend:**

<sup>a</sup> Fold-difference in the number of transposon insertions: e.g. the  $\Delta$ ssdC mutant had 333.3-fold less transposon insertions than the WT.
