# Supplementary material for: A dynamic, ring-forming MucB / RseB-like protein influences spore shape in Bacillus subtilis
Source: PubMed Central journal article supplement (PMC7769602; doi:10.1371/journal.pgen.1009246), 2020-12-14
Supplement: pgen.1009246.s017.pdf [file pgen.1009246.s017.pdf]

**S3 TABLE: *Bacillus subtilis* strains used in this study**

| Strains | Genotype                                                                                            | Source                 |
|---------|-----------------------------------------------------------------------------------------------------|------------------------|
| 168     | <i>Prototrophic wild-type</i>                                                                       | (Zeigler et al., 2008) |
| bAT87   | <i>amyE::PspollQ-cfp(Bs) (cat)</i>                                                                  | This work              |
| bBK3    | <i>ssdC::erm</i>                                                                                    | This work              |
| bBK15   | <i>ywjI::PspollQ-cfp (cat)</i>                                                                      | This work              |
| bBK17   | <i>ywjI::PspollQ-cfp (cat), amyE::PspollD-yfp (spec)</i>                                            | This work              |
| bBK18   | <i>ssdC::erm, ywjI::PspollQ-cfp (cat), amyE::PspollD-yfp (spec)</i>                                 | This work              |
| bBK20   | <i>ycgO::PssdC-opt<sub>RBS</sub>-cfp-ssdC (spec), ssdC::erm</i>                                     | This work              |
| bBK21   | <i>ycgO::PssdC-opt<sub>RBS</sub>-SFgfp-ssdC (spec), ssdC::erm</i>                                   | This work              |
| bBK28   | <i>spoVID::kan</i>                                                                                  | This work              |
| bBK33   | <i>safA::kan</i>                                                                                    | This work              |
| bBK39   | <i>ylmD::kan, ssdC::erm</i>                                                                         | This work              |
| bBK41   | <i>yqhH::kan, ssdC::erm</i>                                                                         | This work              |
| bBK42   | <i>yqhG::kan, ssdC::erm</i>                                                                         | This work              |
| bBK43   | <i>spoVID::kan, ssdC::erm</i>                                                                       | This work              |
| bBK44   | <i>rpsT::kan, ssdC::erm</i>                                                                         | This work              |
| bBK45   | <i>yteV::kan, ssdC::erm</i>                                                                         | This work              |
| bBK46   | <i>skfA::kan, ssdC::erm</i>                                                                         | This work              |
| bBK47   | <i>ctpB::kan, ssdC::erm</i>                                                                         | This work              |
| bBK48   | <i>safA::kan, ssdC::erm</i>                                                                         | This work              |
| bBK49   | <i>cotZ::kan, ssdC::erm</i>                                                                         | This work              |
| bBK50   | <i>yqfT::kan, ssdC::erm</i>                                                                         | This work              |
| bBK51   | <i>mcsA::kan, ssdC::erm</i>                                                                         | This work              |
| bBK52   | <i>ycgO::PssdC-opt<sub>RBS</sub>-cfp-ssdC (spec), ssdC::erm, spoIIAH::kan</i>                       | This work              |
| bBK54   | <i>ycgO::PssdC-opt<sub>RBS</sub>-cfp-ssdC (spec), ssdC::erm, spoVID::kan</i>                        | This work              |
| bBK56   | <i>ycgO::PssdC-opt<sub>RBS</sub>-cfp-ssdC (spec), ssdC::erm, safA::kan</i>                          | This work              |
| bBK57   | <i>ycgO::PssdC-opt<sub>RBS</sub>-cfp-ssdC (spec), ssdC::erm, spoIID::kan</i>                        | This work              |
| bBK60   | <i>ssdC::erm, spoVID::kan, ywjI::PspollQ-cfp (cat), amyE::PspollD-yfp (spec)</i>                    | This work              |
| bBK62   | <i>ssdC::erm, safA::kan, ywjI::PspollQ-cfp (cat), amyE::PspollD-yfp (spec)</i>                      | This work              |
| bBK64   | <i>spoVID::kan, ywjI::PspollQ-cfp (cat), amyE::PspollD-yfp (spec)</i>                               | This work              |
| bBK66   | <i>safA::kan, ywjI::PspollQ-cfp (cat), amyE::PspollD-yfp (spec)</i>                                 | This work              |
| bCR1565 | <i>ssdC::lox72</i>                                                                                  | This work              |
| bHC25   | <i>ycgO::PssdC-opt<sub>RBS</sub>-cfp-ssdC(P174A) (spec), ssdC::erm</i>                              | This work              |
| bHC27   | <i>ycgO::PssdC-opt<sub>RBS</sub>-cfp-ssdC(P238A) (spec), ssdC::erm</i>                              | This work              |
| bHC29   | <i>ycgO::PssdC-opt<sub>RBS</sub>-cfp-ssdC(Y261A) (spec), ssdC::erm</i>                              | This work              |
| bHC31   | <i>ycgO::PssdC-opt<sub>RBS</sub>-cfp-ssdC(F267A) (spec), ssdC::erm</i>                              | This work              |
| bHC33   | <i>ycgO::PssdC-opt<sub>RBS</sub>-cfp-ssdC(E272A) (spec), ssdC::erm</i>                              | This work              |
| bHC45   | <i>ycgO::PssdC-ssdC-His6 (spec), ssdC::erm</i>                                                      | This work              |
| bHC70   | <i>spollQ::cat, ycgO::PssdC-RBS-ssdC-His6 (spec), ssdC::erm</i>                                     | This work              |
| bHC78   | <i>cotE::kan, ssdC::erm</i>                                                                         | This work              |
| bHC99   | <i>ssdC::erm, ycgO::PssdC-opt<sub>RBS</sub>-CFP(8aa)-ssdC (spec), spoVD::markerless, spoVE::kan</i> | This work              |
| bHC144  | <i>ycgO::PssdC-opt<sub>RBS</sub>-cfp-ssdC (S118A) (spec), ssdC::erm</i>                             | This work              |
| bJL3    | <i>ywjI::PspollQ-cfp (cat), spoVE::kan, spoVD::spec</i>                                             | This work              |
| bJL10   | <i>ssdC::erm, spoVIDΩspoVID-gfp (spec)</i>                                                          | This work              |
| bJL12   | <i>spoVIDΩspoVID-gfp (spec)</i>                                                                     | This work              |
| bJL13   | <i>ycgO::PsafA-safA-mYPET (spec)</i>                                                                | This work              |
| bJL33   | <i>spoVM::erm, ycgO::PssdC-opt<sub>RBS</sub>-cfp-ssdC (spec), ssdC::lox72</i>                       | This work              |
| bJL34   | <i>spoIVA::cat, ycgO::PssdC-opt<sub>RBS</sub>-cfp-ssdC (spec), ssdC::erm</i>                        | This work              |
| bJL35   | <i>ycgO::PsafA-safA-mYPET (spec), ssdC::erm</i>                                                     | This work              |
| bJL39   | <i>spoVM::erm, ywjI::PspollQ-cfp (cat)</i>                                                          | This work              |
| bJL40   | <i>spoIVA::cat, ycgO::PssdC-opt<sub>RBS</sub>-sGFP(15aa)-ssdC (spec)</i>                            | This work              |

|               |                                                                                           |           |
|---------------|-------------------------------------------------------------------------------------------|-----------|
| <b>bJL43</b>  | <i>lacA::PspollQ-cfp(erm), spoIVA::cat</i>                                                | This work |
| <b>bJL44</b>  | <i>spoVE::kan, spoVD::spec, ycgO::PssdC-opt<sub>RBS</sub>-cfp-ssdC (spec), ssdC::erm</i>  | This work |
| <b>bJL56</b>  | <i>amyE::PspollQ-cfp(Bs) (cat), ssdC::erm</i>                                             | This work |
| <b>bJL59</b>  | <i>spoIVA::cat</i>                                                                        | This work |
| <b>bJL66</b>  | <i>yycR::PsspB-rbsopt-cfp (phleo), ssdC::erm</i>                                          | This work |
| <b>bJL78</b>  | <i>amyE::PspollQ-malF(2TM)-gfpΩcat</i>                                                    | This work |
| <b>bJL79</b>  | <i>amyE::PspollQ-malF(2TM)-gfpΩcat, ssdC::erm</i>                                         | This work |
| <b>bJL80</b>  | <i>amyE::PspollQ-malF(2TM)-gfpΩcat, ssdC::erm, spoVID::kan</i>                            | This work |
| <b>bJL81</b>  | <i>amyE::PspollQ-malF(2TM)-gfpΩcat, ssdC::erm, safA::kan</i>                              | This work |
| <b>bJL82</b>  | <i>ssdC::erm, ywjl::PspollQ-cfp (cat), spoVE::kan, spoVD::spec</i>                        | This work |
| <b>bJL107</b> | <i>yoch::kan, ssdC::erm</i>                                                               | This work |
| <b>bJL108</b> | <i>yodJ::kan, ssdC::erm</i>                                                               | This work |
| <b>bJL109</b> | <i>yceE::kan, ssdC::erm</i>                                                               | This work |
| <b>bJL110</b> | <i>yjgD::kan, ssdC::erm</i>                                                               | This work |
| <b>bJL111</b> | <i>dltD::kan, ssdC::erm</i>                                                               | This work |
| <b>bJL112</b> | <i>ypbE::kan, ssdC::erm</i>                                                               | This work |
| <b>bJL114</b> | <i>yqhQ::kan, ssdC::erm</i>                                                               | This work |
| <b>bJL115</b> | <i>yrrL::kan, ssdC::erm</i>                                                               | This work |
| <b>bJL117</b> | <i>yxiS::kan, ssdC::erm</i>                                                               | This work |
| <b>bJL118</b> | <i>ymzB::kan, ssdC::erm</i>                                                               | This work |
| <b>bJL119</b> | <i>yrrl::kan, ssdC::erm</i>                                                               | This work |
| <b>bJL120</b> | <i>yacL::kan, ssdC::erm</i>                                                               | This work |
| <b>bJL121</b> | <i>dltB::kan, ssdC::erm</i>                                                               | This work |
| <b>bJL129</b> | <i>ycgO::PspoIVA-mYPET-spoIVA (cat)</i>                                                   | This work |
| <b>bJL133</b> | <i>spoVMΩspoVM-gfp (spec)</i>                                                             | This work |
| <b>bJL135</b> | <i>spoVMΩspoVM-gfp (spec), ssdC::erm</i>                                                  | This work |
| <b>bJL136</b> | <i>spoIVA::neo, ycgO::PspoIVA-mYPET-spoIVA (cat)</i>                                      | This work |
| <b>bJL140</b> | <i>ssdC::erm, ycgO::PspoIVA-mYPET-spoIVA (cat)</i>                                        | This work |
| <b>bJL158</b> | <i>spoVIDΩspoVID-gfp (spec), safA::kan</i>                                                | This work |
| <b>bJL159</b> | <i>ycgO::PsafA-safA-mYPET (spec), spoVID::kan</i>                                         | This work |
| <b>bJL160</b> | <i>ycgO::PsafA-safA-mYPET (spec), ssdC::erm, spoVID::kan</i>                              | This work |
| <b>bJL162</b> | <i>ssdC::erm, spoVIDΩspoVID-gfp (spec), safA::kan</i>                                     | This work |
| <b>bJL175</b> | <i>ycgO::PssdC-opt<sub>RBS</sub>-cfp-ssdC (spec), ssdC::erm, spollQ::cat</i>              | This work |
| <b>bJL176</b> | <i>ycgO::PssdC-opt<sub>RBS</sub>-cfp-ssdC (spec), ssdC::erm, spollP::tet</i>              | This work |
| <b>bJL177</b> | <i>ycgO::PssdC-opt<sub>RBS</sub>-cfp-ssdC (spec), ssdC::erm, spollD::kan, spollP::tet</i> | This work |
| <b>bJL178</b> | <i>yycR::PsspB-rbsopt-cfp (phleo), spollIAH (spec), ssdC::erm</i>                         | This work |
| <b>bJL179</b> | <i>yycR::PsspB-rbsopt-cfp (phleo), spollIAH (spec), gerM::erm</i>                         | This work |
| <b>bJL185</b> | <i>spollQ::erm, ycgO::PspoIVA-mYPET-spoIVA (cat)</i>                                      | This work |
| <b>bJL187</b> | <i>spollQ::erm, spoVMΩspoVM-gfp (spec)</i>                                                | This work |
| <b>bJL188</b> | <i>spoVMΩspoVM-gfp (spec), spollP::tet, spollD::kan</i>                                   | This work |
| <b>bJL189</b> | <i>ycgO::PspoIVA-mYPET-spoIVA (cat), spollP::tet, spollD::kan</i>                         | This work |
| <b>bJL190</b> | <i>safA::tet, ycgO::PssdC-opt<sub>RBS</sub>-cfp-ssdC (spec), ssdC::erm, spoVID::kan</i>   | This work |
| <b>bJL193</b> | <i>amyE::PspollQ-malF(2TM)-gfpΩcat, spoVID::kan</i>                                       | This work |
| <b>bJL196</b> | <i>safA::tet, spoVID::kan, ywjl::PspollQ-cfp (cat), amyE::PspollD-yfp(JF)(spec)</i>       | This work |
| <b>bJL199</b> | <i>amyE::PspollQ-malF(2TM)-gfpΩcat, safA::kan</i>                                         | This work |
| <b>bKH21</b>  | <i>yycR::PsspB-rbsopt-cfp (phleo)</i>                                                     | This work |
| <b>bKH23</b>  | <i>yycR::PsspB-rbsopt-cfp (phleo), spollIAH (spec)</i>                                    | This work |
