# Supplementary material for: A dynamic, ring-forming MucB / RseB-like protein influences spore shape in Bacillus subtilis
Source: PubMed Central journal article supplement (PMC7769602; doi:10.1371/journal.pgen.1009246), 2020-12-14
Supplement: pgen.1009246.s018.pdf [file pgen.1009246.s018.pdf]

**S4 TABLE: Plasmids used in this study**

| Plasmids     | Description                                                  | Source    |
|--------------|--------------------------------------------------------------|-----------|
| <b>pBK2</b>  | <i>ycgO::cfp (spec)</i>                                      | This work |
| <b>pBK7</b>  | <i>ycgO::SFgfp (spec)</i>                                    | This work |
| <b>pBK9</b>  | <i>ycgO::PssdC-opt<sub>RBS</sub>-SFgfp (spec)</i>            | This work |
| <b>pBK10</b> | <i>ycgO::PssdC-opt<sub>RBS</sub>-SFgfp-ssdC (spec)</i>       | This work |
| <b>pBK16</b> | <i>ycgO::PssdC-opt<sub>RBS</sub>-cfp (spec)</i>              | This work |
| <b>pBK17</b> | <i>ycgO::PssdC-opt<sub>RBS</sub>-cfp-ssdC (spec)</i>         | This work |
| <b>pHC7</b>  | <i>ycgO::PssdC-opt<sub>RBS</sub>-cfp-ssdC (P174A) (spec)</i> | This work |
| <b>pHC8</b>  | <i>ycgO::PssdC-opt<sub>RBS</sub>-cfp-ssdC (P238A) (spec)</i> | This work |
| <b>pHC9</b>  | <i>ycgO::PssdC-opt<sub>RBS</sub>-cfp-ssdC (Y261A) (spec)</i> | This work |
| <b>pHC10</b> | <i>ycgO::PssdC-opt<sub>RBS</sub>-cfp-ssdC (F267A) (spec)</i> | This work |
| <b>pHC11</b> | <i>ycgO::PssdC-opt<sub>RBS</sub>-cfp-ssdC (E272A) (spec)</i> | This work |
| <b>pHC22</b> | <i>ycgO::PssdC-ssdC-His6 (spec)</i>                          | This work |
| <b>pHC51</b> | <i>ycgO::PssdC-opt<sub>RBS</sub>-cfp-ssdC (S118A) (spec)</i> | This work |
| <b>pJL1</b>  | <i>ycgO::PsafA-safA-mYPET (spec)</i>                         | This work |
| <b>pJL6</b>  | <i>ycgO::PspoIVA-mYPET-spoIVA (cat)</i>                      | This work |
