# Supplementary material for: A dynamic, ring-forming MucB / RseB-like protein influences spore shape in Bacillus subtilis
Source: PubMed Central journal article supplement (PMC7769602; doi:10.1371/journal.pgen.1009246), 2020-12-14
Supplement: pgen.1009246.s019.pdf [file pgen.1009246.s019.pdf]

**S5 TABLE: Oligonucleotide primers used in this study**

| Primers | Sequence*                                                 |
|---------|-----------------------------------------------------------|
| oAT005  | cgcaAGCTTAcataaggaggaactactatgagtaaaggagaagaactttc        |
| oAT006  | cgCCTCGAGgccgcttgagcctccagatgatcctttgtatagttcatccatgccatg |
| oCR652  | cgGAATTCgaatttctcgccggcagattc                             |
| oCR653  | gcgAAGCTTaattgatgtaaaaggaagaaatcgC                        |
| oCR654  | cgCCTCGAGttgaaaaaggtagaaaaagctttg                         |
| oCR655  | gcgGGATCCggctaagggaacgatgtctaac                           |
| oCR660  | cgcaAGCTTAcataaggaggaactactatggttcaaaaggcgaagaactg        |
| oCR663  | cggCCTCGAGgccgcttgagcctccagatgatcccttataaaagttcgtccatgcc  |
| oCR666  | gcgCCTCGAGtgagctcccaccgctgctcccaccgcttgagcctccagatgatcc   |
| oCR735  | cgcaAGCTTctgcccgttatgattgacgga                            |
| oCR736  | ctgaaaatatacgacctttccaagtatcccctcccggactcctatc            |
| oCR737  | ttgaaaaggctgatattttcaagatgcaaaaggcgaagagctgtt             |
| oCR738  | gcgCCTCGAGgccggactgtaaagttcattcatcccttctg                 |
| oCR739  | gcgCCTCGAGttgaaaaggctgatattttcaagga                       |
| oCR740  | cgCGATCCTtacaggatgatggcgattaagcc                          |
| oHC007  | aaagcattggccgaacaacgccagccaggtttatctgtttga                |
| oHC008  | tcaaacagataaacctggctggcgtttctcgccaatcgcttt                |
| oHC009  | ttaacaaaaagatatgagcgcgtcatctgtcaaaagtatgga                |
| oHC010  | tccatcactttgacagatgacgcgctcatatctttttgtaa                 |
| oHC011  | tcaaaacgccgctggaactggcgttgccgtcaagctgctga                 |
| oHC012  | tcaaaacgccgctggaactggcgttgccgtcaagctgctga                 |
| oHC015  | ggaagcgcacatcatgacggccggaggagaaaaatcatttac                |
| oHC016  | gtaaatgattttctcctccggcctcatgatgatgcgcttcc                 |
| oHC017  | cgtacggaggagaaaaatcagctacgttaattcaggaaaaagc               |
| oHC018  | gcttttctgaattaacgtagctgattttctcctccgtacg                  |
| oHC019  | aatcatttacgttaattcaggcaaaaagcccagattgccaaggc              |
| oHC020  | gccttgcaatctggcctttgctgaattaacgtaaatgatt                  |
| oHC037  | gcgCCTCGAGgaatttctcgccggcagattc                           |
| oHC038  | cgCGATCCTtaatggtgatggatgatgtttcagatgattgtccctgca          |
| oJL001  | cgGAATTCgcactcctgcccctgaatcgaat                           |
| oJL004  | cgCGATCCTtactgtaaagttcattcatcccttctg                      |
| oJL005  | gcgCCTCGAGctcattttcttccggacgg                             |
| oJL006  | gcgCCTCGAGatgtcaaaaggcgaagagctg                           |

**Legend:**

\*capital letters indicate restriction sites
