# Supplementary material for: A dynamic, ring-forming MucB / RseB-like protein influences spore shape in Bacillus subtilis
Source: PubMed Central journal article supplement (PMC7769602; doi:10.1371/journal.pgen.1009246), 2020-12-14
Supplement: pgen.1009246.s020.pdf [file pgen.1009246.s020.pdf]

## S1 Methods

### Plasmid construction

**pBK2** [*ycgO::cfp (spec)*] was generated in a two-way ligation with *HindIII-XhoI* PCR product containing the *cfp* gene [oligonucleotide primers oCR660 & oCR663 and pDT19 (*amyE::PspolIIA-RBSspolIIAA-cfp-spolIIAG (spec)*) (Doan et al., 2009) as template] and pKM083 (*ycgO::spec*) cut with *HindIII* and *XhoI*. pKM083 is an ectopic integration vector for double crossover integration at the non-essential *ycgO* locus (Rudner, D.Z, unpublished).

**pBK7** [*ycgO::SFgfp (spec)*] was generated in a two-way ligation with *HindIII-XhoI* PCR product containing the super-folder *gfp* gene (*SFgfp*) and pKM083. The PCR product was obtained through separate amplifications: 1) oligonucleotide primers oAT005 & oAT006 and pCR035 (*His-SUMO-sfGFP-spollIQ<sup>ECD</sup>*) (Rodrigues et al., 2013) as template, then 2) oAT005 & oCR666 to extend linker to 15 aa using the former PCR product as template. pKM083 (*ycgO::spec*) was cut with *HindIII* and *XhoI*. pKM083 is an ectopic integration vector for double crossover integration at the non-essential *ycgO* locus (Rudner, D.Z, unpublished)

**pBK9** [*ycgO::PssdC-opt<sub>RBS</sub>-SFgfp (spec)*] was generated in a two-way ligation with *EcoRI-HindIII* PCR product containing the *ssdC* promoter (oligonucleotide primers oCR652 & oCR653 and 168 genomic DNA as template) and pBK7 cut with *EcoRI* and *HindIII*.

**pBK10** [*ycgO::PssdC-opt<sub>RBS</sub>-SFgfp-ssdC (spec)*] was generated in a two-way ligation with *XhoI-BamHI* PCR product containing the *ssdC* gene (oligonucleotide primers oCR654 & oCR655 and 168 genomic DNA as template) and pBK9 cut with *XhoI* and *BamHI*.

**pBK16** [*ycgO::PssdC-opt<sub>RBS</sub>-cfp (spec)*] was generated in a two-way ligation with *EcoRI-HindIII* PCR product containing the *ssdC* promoter (oligonucleotide primers oCR652 & oCR653 and 168 genomic DNA as template) and pBK2 cut with *EcoRI* and *HindIII*.

**pBK17** [*ycgO::PssdC-opt<sub>RBS</sub>-cfp-ssdC (spec)*] was generated in a two-way ligation with *XhoI-BamHI* PCR product containing the *ssdC* gene (oligonucleotide primers oCR654 & oCR655 and 168 genomic DNA as template) and pBK16 cut with *XhoI* and *BamHI*.

**pHC7** [*ycgO::PssdC-opt<sub>RBS</sub>-cfp-ssdC (P174A) (spec)*] was generated by site-directed mutagenesis of pBK17 using oligonucleotide primers oHC009 & oHC010.

**pHC8** [*ycgO::PssdC-opt<sub>RBS</sub>-cfp-ssdC (P238A) (spec)*] was generated by site-directed mutagenesis of pBK17 using oligonucleotide primers oHC011 & oHC012.

**pHC9** [*ycgO::PssdC-opt<sub>RBS</sub>-cfp-ssdC (Y261A) (spec)*] was generated by site-directed mutagenesis of pBK17 using oligonucleotide primers oHC015 & oHC016.

**pHC10** [*ycgO::PssdC-opt<sub>RBS</sub>-cfp-ssdC (F267A) (spec)*] was generated by site-directed mutagenesis of pBK17 using oligonucleotide primers oHC017 & oHC018.

**pHC11** [*ycgO::PssdC-opt<sub>RBS</sub>-cfp-ssdC (E272A) (spec)*] was generated by site-directed mutagenesis of pBK17 using oligonucleotide primers oHC019 & oHC020.

**pHC22** [*ycgO::PssdC-ssdC-His6 (spec)*] was generated in a two-way ligation with *XhoI-BamHI* PCR product containing the *ssdC* promoter and *ssdC* gene (oligonucleotide primers oHC037 & oHC038 and 168 genomic DNA as template) and pKM083 (*ycgO::spec*) cut with *XhoI* and *BamHI*. pKM083 is an ectopic integration vector for double crossover integration at the non-essential *ycgO* locus

(Rudner, D.Z, unpublished). A sequence encoding His6 was incorporated into oHC038 to introduce a C-terminal His6 tag in-frame of SsdC.

**pHC51** [*ycgO::PssdC-opt<sub>RBS</sub>-cfp-ssdC (S118A) (spec)*] was generated by site-directed mutagenesis of pBK17 using oligonucleotide primers oHC007 & oHC008.

**pJL1** [*ycgO::PsafA-safA-mYPET (spec)*] was generated in a three-way ligation with three pieces of DNA: 1) *EcoRI-XhoI* cut PCR product containing the *safA* gene (oligonucleotide primers oJL001 & oJL005 and 168 genomic DNA as template), 2) *XhoI-BamHI* cut PCR product containing mYPET (oligonucleotide primers oJL004 & oJL006 and pAT29 plasmid DNA [*ycgO::PyqfZ-opt<sub>RBS</sub>-mYPET-yqfZ (spec)*] as template), and pKM83 (*ycgO::spec*) cut with *EcoRI* and *BamHI*. pKM83 (*ycgO::spec*) is a double crossover vector for ectopic integration at the non-essential locus *ycgO* (Rudner, D.Z, unpublished).

**pJL6** [*ycgO::PspoIVA-mYPET-spoIVA (cat)*] was generated in a three-way ligation with three pieces of DNA, as follows: 1) *HindIII-XhoI* cut PCR product containing the promoter of *spoIVA* and mYPET (oligonucleotide primers oCR735 & oCR738 with the Gibson assembly product as template; the Gibson assembly product contained the promoter of *spoIVA* (oligonucleotide primers oCR735 & oCR736 and genomic DNA of 168 as template) and mYPET [oligonucleotide primers oCR737 & oCR738 and plasmid DNA of pAT29 (*ycgO::PyqfZ-opt<sub>RBS</sub>-mYPET-yqfZ (spec)*) as template]; 2) *XhoI-BamHI* cut PCR product containing the *spoIVA* open-reading frame (oligonucleotide primers oCR739 & oCR740 and 168 genomic DNA as template) and 3) plasmid pKM77 (*ycgO::cat*) cut with *HindIII* and *BamHI*. pKM77 is a double crossover vector for ectopic integration at the non-essential locus *ycgO* (Rudner, D.Z, unpublished).

## References

- DOAN, T., MORLOT, C., MEISNER, J., SERRANO, M., HENRIQUES, A. O., MORAN, C. P., JR. & RUDNER, D. Z. 2009. Novel secretion apparatus maintains spore integrity and developmental gene expression in *Bacillus subtilis*. *PLoS Genet*, 5, e1000566.
- RODRIGUES, C. D., MARQUIS, K. A., MEISNER, J. & RUDNER, D. Z. 2013. Peptidoglycan hydrolysis is required for assembly and activity of the transenvelope secretion complex during sporulation in *Bacillus subtilis*. *Mol Microbiol*, 89, 1039-52.
- ZEIGLER, D. R., PRÁGAI, Z., RODRIGUEZ, S., CHEVREUX, B., MUFFLER, A., ALBERT, T., BAI, R., WYSS, M. & PERKINS, J. B. 2008. The origins of 168, W23, and other *Bacillus subtilis* legacy strains. *Journal of Bacteriology*, 190, 6983-6995.
